# Supplementary material for: Characterization of sand and sand–binder systems from the foundry industry with electrical impedance spectroscopy
Source: Copernicus journal article supplement (doi:10.5194/jsss-10-43-2021), 2021-02-24
Supplement: Supplementary file 1 [file jsss-10-43-2021-supplement.zip]

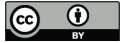

## *Supplement of*

# **Characterization of sand and sand–binder systems from the foundry industry with electrical impedance spectroscopy**

**Luca Bifano et al.**

*Correspondence to:* Luca Bifano ([luca.bifano@uni-bayreuth.de](mailto:luca.bifano@uni-bayreuth.de))

- [jsss-10-43-2021-supplement-title-page.pdf](#)
- Code
  - [programDescription.m](#)
- Data
  - MUT 1
    - \* [1](#)
    - \* [1a](#)
  - MUT 2
    - \* [20200109\\_100301](#)
    - \* [20200109\\_104452](#)
    - \* [20200109\\_153149](#)
    - \* [20200109\\_160713](#)
    - \* [20200109\\_163541](#)
    - \* [20200109\\_171822](#)
    - \* [20200109\\_174511](#)
    - \* [20200110\\_080508](#)
    - \* [20200110\\_162935](#)
    - \* [20200113\\_090409](#)
  - MUT 3
    - \* [a](#)
    - \* [b](#)
    - \* [c](#)
    - \* [d](#)
    - \* [e](#)

The copyright of individual parts of the supplement might differ from the CC BY 4.0 License.
